# Supplementary material for: Impact of a structured ICU training programme in resource-limited settings in Asia
Source: PubMed Central journal article supplement (PMC5349661; doi:10.1371/journal.pone.0173483), 2017-03-14

## Supporting Information (S2 Fig)

### Supplement 2: Adapted sepsis guidelines prepared by Rourkela ICU team based on training module on sepsis

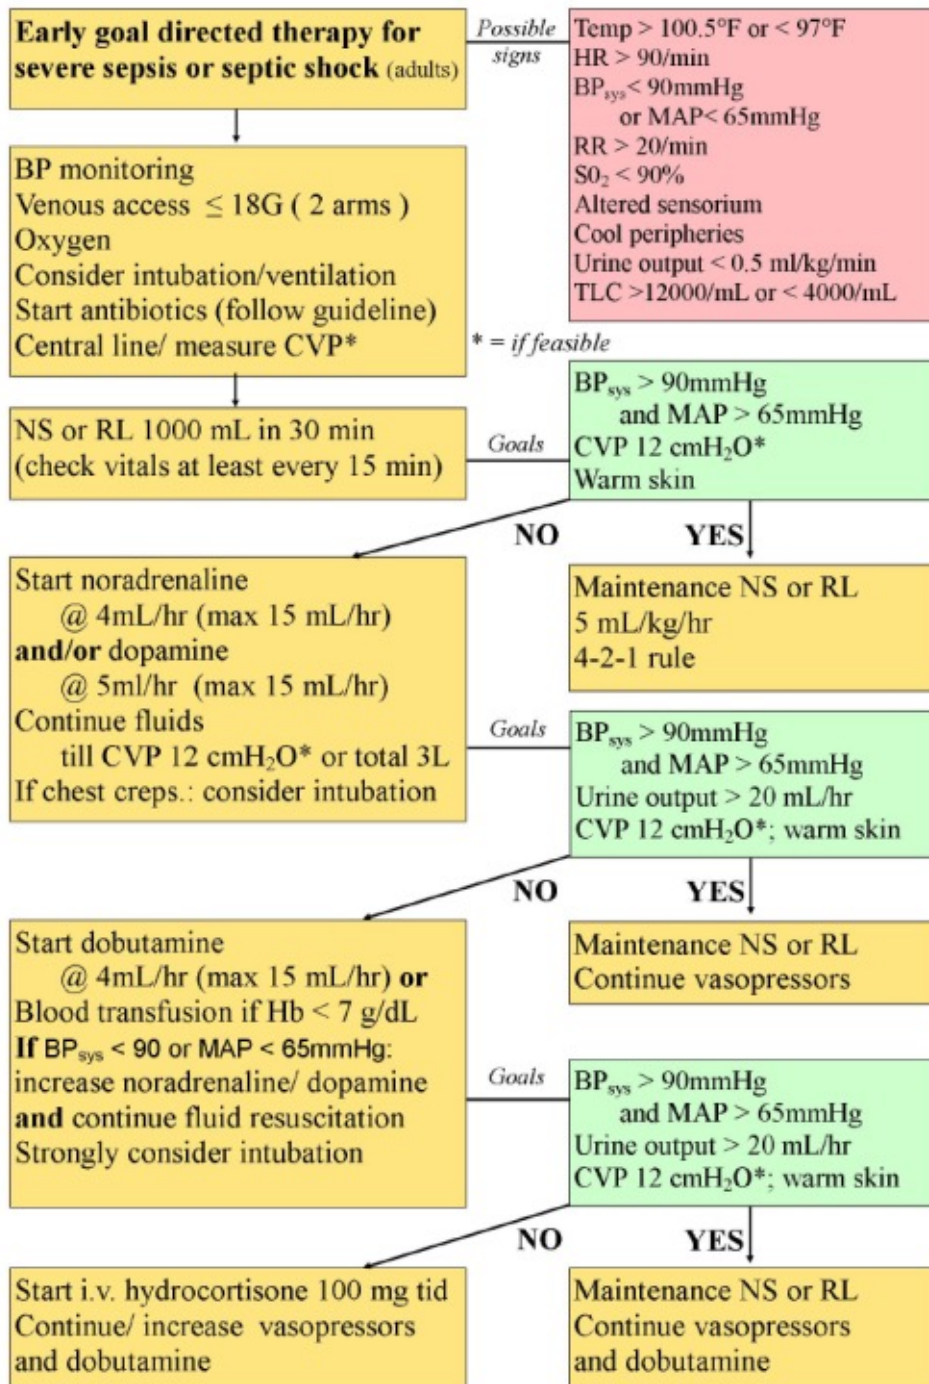

Supplement: pone.0173483.s002.pdf [file pone.0173483.s002.pdf]
