# Supplementary material for: Impact of a structured ICU training programme in resource-limited settings in Asia
Source: PubMed Central journal article supplement (PMC5349661; doi:10.1371/journal.pone.0173483), 2017-03-14

## Supporting Information (S3 Fig)

### Supplement 3: The relationship between duration of mechanical ventilation and proportion of patients being mechanically ventilated in Rourkela

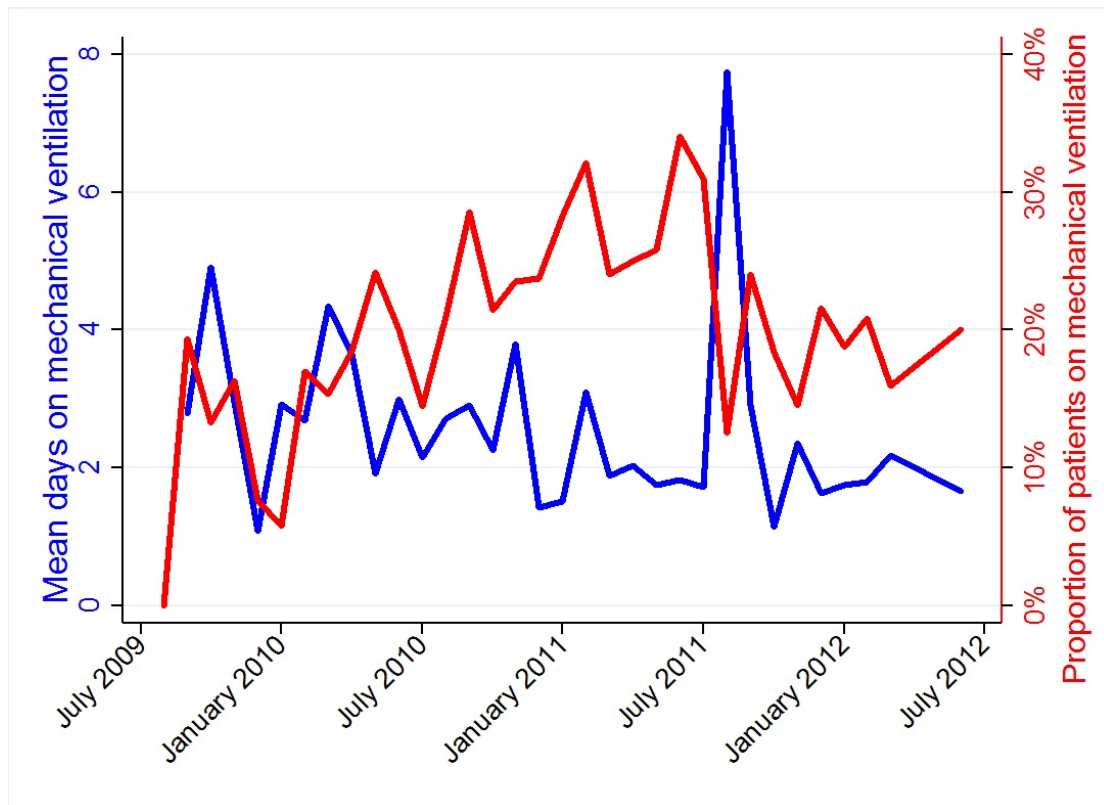

Supplement: pone.0173483.s003.pdf [file pone.0173483.s003.pdf]
